# Supplementary material for: Coix Seed Extract Enhances the Anti-Pancreatic Cancer Efficacy of Gemcitabine through Regulating ABCB1- and ABCG2-Mediated Drug Efflux: A Bioluminescent Pharmacokinetic and Pharmacodynamic Study
Source: MDPI journal article supplement (doi:10.3390/ijms20215250), 2019-10-23
Supplement: s1 [file s1]

## Certificate of Language Editing

---

"This document certifies that the following manuscript has been evaluated and edited for proper English language, grammar, syntax and overall structure. The manuscript has been properly reviewed to meet our highest quality standards and is now ready for submission."

---

**Name of Manuscript:**

Coix seed extract enhances the anti-pancreatic cancer efficacy of gemcitabine through regulating ABCB1- and ABCG2-mediated drug efflux : A bioluminescent pharmacokinetic and pharmacodynamic study

**Authors:**

Mancang Gu et al.

**Date:**

10/07/2019

**Approving Editor:**

Michael C. Lin

---
